# Supplementary material
Source: PubMed Central journal article supplement (PMC5685549)

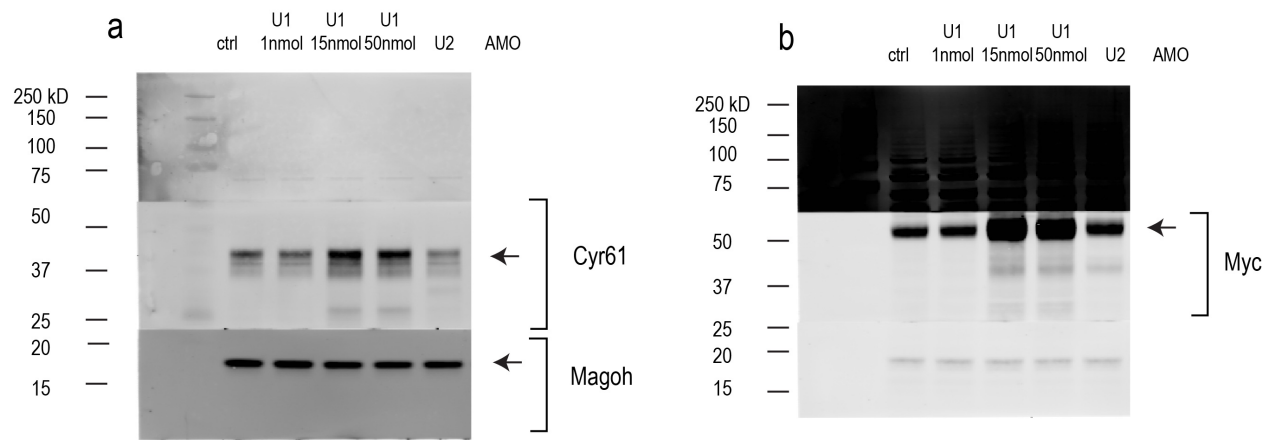

Supplement: NIHMS913869-supplement-Supplementary_Data_Set.pdf [file NIHMS913869-supplement-Supplementary_Data_Set.pdf]
